# Supplementary material for: Hydrodeoxygenation of bio-oil over Pt-based supported catalysts: importance of mesopores and acidity of the support to compounds with different oxygen contents
Source: Royal Society of Chemistry journal article supplement (doi:10.1039/c3ra41405a), 2013-01-01
Supplement: c3ra41405a.pdf [file c3ra41405a.pdf]

Supplemental materials for

# Hydrodeoxygenation of Bio-oil over Pt Supported Catalyst: Importance of Mesopores and Acidity of Support to Compounds of Different Oxygen Contents

Yuxin Wang,<sup>a,b,\*</sup> Jinhu Wu<sup>a</sup> and Shengnian Wang<sup>b,\*</sup>

<sup>a</sup> Key Laboratory of Biofuels, Qingdao Institute of Bioenergy and Bioprocess Technology, Chinese academy of Sciences, 189 Songling road, Qingdao, Shandong 266101, P. R. China.

<sup>b</sup> Institute for Micromanufacturing, Louisiana Tech University, 911 Hergot Avenue, Ruston, Louisiana 71270, USA.

\* Correspondence to [yxwang@latech.edu](mailto:yxwang@latech.edu) and [swang@latech.edu](mailto:swang@latech.edu)

## Supplementary figures

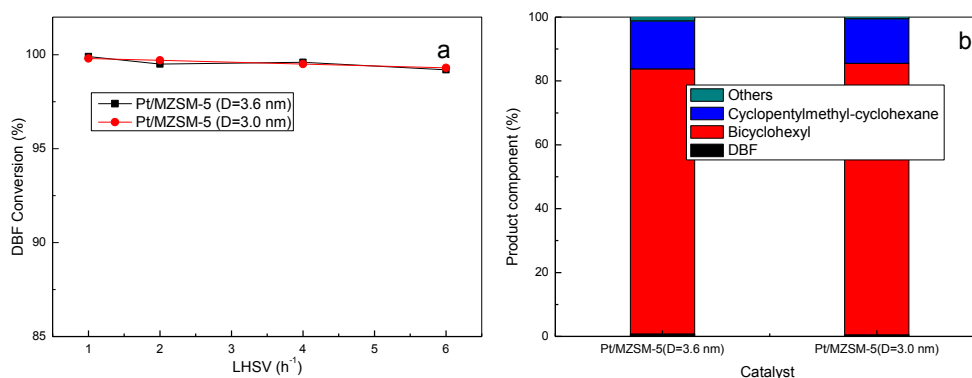

**Fig. S1** The DBF conversion (a) and product component at LHSV= 6 h<sup>-1</sup> (b) over over Pt/MZSM-5 (D=3.6 nm) and Pt/MZSM-5 (D=3.0 nm)

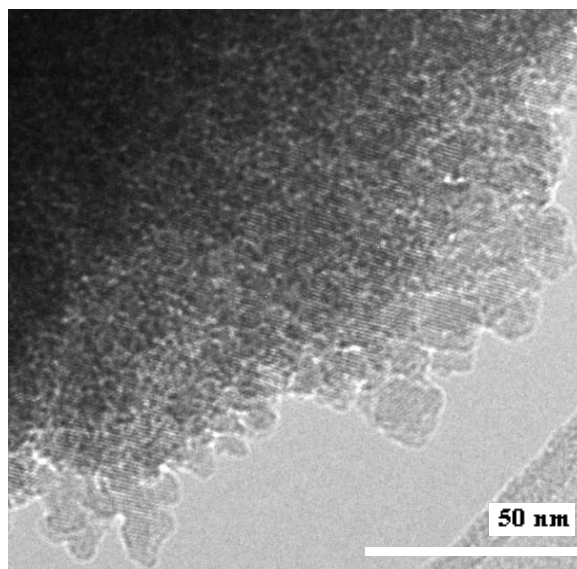

**Fig. S2** TEM image of MZSM-5
